# Supplementary material for: Protocol for a scoping review study to identify and classify patient-centred quality indicators
Source: PubMed Central journal article supplement — BMJ Open. 2017 Jan 5;7(1):e013632. doi: 10.1136/bmjopen-2016-013632 (PMC5223714; doi:10.1136/bmjopen-2016-013632), 2017-01-05
Supplement: bmjopen-2016-013632supp_appendix.pdf [file bmjopen-2016-013632supp_appendix.pdf]

Appendix 1- Proposed search strategy

| <b>Concept</b>       | <b>Search terms</b>                                                                                                                                                                                                                                                                                                                                                                                                                                                                                                                                                                                                                                            |
|----------------------|----------------------------------------------------------------------------------------------------------------------------------------------------------------------------------------------------------------------------------------------------------------------------------------------------------------------------------------------------------------------------------------------------------------------------------------------------------------------------------------------------------------------------------------------------------------------------------------------------------------------------------------------------------------|
| Patient-centred care | exp patient-centered care OR Culturally Competent Care OR person-centered care OR client-centered care OR (carer* OR care giver* OR caregiver* OR culture* OR cultural* OR family OR families OR parents OR patient* OR person) AND (centered* OR centred* or focused) AND (care or healthcare or nursing or medical or medicine)).kw.tw. OR patient rights; OR (advocacy or autonomy or beliefs or choice or perspectives or preferences or rights or satisfaction or values or views) AND (care or healthcare or nursing or medical or medicine)).tw. OR cultural competency OR culturally competent care).tw. OR patient satisfaction OR patient preference |
| Quality Indicators   | exp Quality Indicators, Health Care/ benchmarking/ or clinical audit/ performance measure* or (healthcare adjustment, monitor*) or performance reporting or QI or PQI or (quality adj3 criteria) or (quality adj3 indicator*) or (quality adj3 measure*) or (quality adj3 scale*).tw,kw, Guideline Adherence/ OR quality control/ or medical audit/ OR performance measurement system/                                                                                                                                                                                                                                                                         |
